# Supplementary material for: Highly efficient Cr2O72−removal of a 3D metal-organic framework fabricated by tandem single-crystal to single-crystal transformations from a 1D coordination array
Source: Royal Society of Chemistry journal article supplement (doi:10.1039/c7cc04527a), 2017-01-01
Supplement: c7cc04527a1.pdf [file c7cc04527a1.pdf]

***Electronic Supplementary Information***

**Highly efficient  $\text{Cr}_2\text{O}_7^{2-}$  removal of a 3D metal–organic framework fabricated by tandem single-crystal to single-crystal transformations from a 1D coordination array**

**Cheng-Peng Li,<sup>a</sup> Hang Zhou,<sup>a</sup> Si Wang,<sup>a</sup> Jing Chen,<sup>a</sup> Zhong-Liang Wang<sup>\*b</sup>**

**and Miao Du<sup>\*a</sup>**

*<sup>a</sup> College of Chemistry, Tianjin Normal University, Tianjin 300387, China. E-mail:*

*dumiao@public.tpt.tj.cn*

*<sup>b</sup> Tianjin Key Laboratory of Water Environment and Resources, Tianjin Normal University, Tianjin*

*300387, China. E-mail: zhongliang\_wang@163.com*

***Chem. Commun.***

## Experimental details

**Materials and general methods.** All chemicals and solvents were commercially available and used as received, with the exception of the ligand **L**<sup>243</sup> that was prepared according to the literature method.<sup>1</sup> Fourier transform (FT) IR spectra (KBr pellets) were recorded on an AVATAR-370 (Nicolet) spectrometer. Elemental analyses of C, H, and N were carried out on a CE-440 (Leeman labs) analyzer. Powder X-ray diffraction (PXRD) patterns were taken on a D/Max-2500 diffractometer (Rigaku) at 40 kV and 100 mA for a Cu-target tube ( $\lambda = 1.5406 \text{ \AA}$ ). The calculated PXRD patterns were obtained from the single-crystal diffraction data using the PLATON software package.<sup>2</sup> Thermogravimetric (TG) analysis was measured on a TG209 thermal analyzer (NETZSCH) in 25–600 °C region at a heating rate of 10 °C/min under nitrogen atmosphere. Solid state fluorescence spectra were taken on a Cary Eclipse spectrofluorimeter (Varian). UV-vis spectra of the solution were collected on a Lambda 35 spectrophotometer (PerkinElmer) to monitor the exchange progress. Inductively coupled plasma mass spectrometry (ICP-MS) measurement analysis was conducted on an Ultima2 spectrometer (HORIBA JY) after degradation of the sample in HNO<sub>3</sub>.

**Single-crystal X-ray diffraction.** Single-crystal X-ray diffraction data for **1–4** were collected on a Bruker Apex II CCD diffractometer at 296(2) K for **1**, **3** and **4**, or 173(2) K for **2** with Mo K $\alpha$  radiation ( $\lambda = 0.71073 \text{ \AA}$ ). Semi-empirical absorption corrections were used with SADABS and the program SAINT was applied for integration of the diffraction profiles.<sup>3</sup> All the structures were solved by direct methods using the SHELXS program of the SHELXTL package and refined with SHELXL.<sup>4</sup> The final refinements were performed by full-matrix least-squares methods on  $F^2$  with anisotropic thermal parameters for all non-H atoms. The hydrogen atoms of the ligands were generated geometrically and isotropic displacement parameters of hydrogen were derived from their parents. For **2**, the nitrite anion and water molecules (O4 and O5) are disordered over two sites with the occupancy factors

of 0.86/0.14, 0.47/0.28, and 0.41/0.09, respectively. The affiliated H atoms of lattice water molecules in **2** were not determined. For **3**, three fluorine atoms (F1–F3) of a trifluoroacetate are disordered over two sites, with the occupancy factor of 0.61/0.39. The lattice water molecules (O3 and O4) in **3** were assigned to the half occupancy to achieve the appropriate thermal parameters. Crystallographic parameters and selected bond lengths and angles are listed in Table S1 and Table S2.

### Syntheses.

**[Ag(L<sup>243</sup>)(NO<sub>2</sub>)](CHCl<sub>3</sub>) (**1**).** A CH<sub>3</sub>OH solution (5 mL) of AgNO<sub>2</sub> (15.4 mg, 0.10 mmol) was layered upon a CHCl<sub>3</sub> solution (5 mL) of L<sup>243</sup> (30.0 mg, 0.1 mmol), which was left to stand under ambient condition. Colorless block-shaped crystals of **1** suitable for X-ray diffraction were obtained upon slow evaporation of the solvents after ca. 1 week in 58% yield. Anal. Calcd for C<sub>18</sub>H<sub>13</sub>AgCl<sub>3</sub>N<sub>7</sub>O<sub>2</sub> (**1**): C, 37.69; H, 2.28; N, 17.09%. Found: C, 37.57; H, 2.39; N, 16.81%. IR (cm<sup>-1</sup>): 3060m, 1592vs, 1573w, 1505m, 1450s, 1422m, 1270vs, 1169w, 1170w, 991w, 846w, 813w, 791w, 739w, 705m, 636w, 612w.

**[Ag(L<sup>243</sup>)](NO<sub>2</sub>)(H<sub>2</sub>O)<sub>4.25</sub> (**2**).** Well-shaped single crystals of **1** (30 mg) were immersed in a water solution (10 mL) in darkness, forming colorless block crystals of **2** after ca. 5 days. Anal. Calcd for C<sub>17</sub>H<sub>16.5</sub>AgN<sub>7</sub>O<sub>4.25</sub> (**2**): C, 41.27; H, 3.36; N, 19.82%. Found: C, 41.08; H, 3.51; N, 19.57%. IR (cm<sup>-1</sup>): 3434b, 1629s, 1591s, 1506w, 1446m, 1418w, 1385m, 1270vs, 1163w, 1083w, 988w, 843w, 787w, 703w, 633w, 608w.

**[Ag(L<sup>243</sup>)](CF<sub>3</sub>CO<sub>2</sub>)(H<sub>2</sub>O)<sub>2</sub> (**3**).** Well-shaped single crystals of **1** or **2** were immersed into a water solution (10 mL) of CF<sub>3</sub>COONa (0.1 mol L<sup>-1</sup>) in darkness for ca. 1 week (for **1**) or eight hours (for **2**), forming colorless block crystals of **3**. Anal. Calcd for C<sub>19</sub>H<sub>14</sub>AgF<sub>3</sub>N<sub>6</sub>O<sub>3</sub> (**3**): C, 41.27; H, 3.36; N, 19.82%. Found: C, 41.12; H, 3.50; N, 19.65%. IR (cm<sup>-1</sup>): 3421b,

3057m, 1681vs, 1592s, 1569m, 1507m, 1444m, 1423m, 1208s, 1127s, 1026w, 990w, 841m, 794m, 721m, 705m, 631w, 611w, 516w.

**Anion exchange studies.** Dried single crystals of **3** (0.2 mmol) were immersed in a water solution (10 mL) of  $\text{K}_2\text{Cr}_2\text{O}_7$  (0.1 mmol), which was left to stand at room temperature. The solution was monitored at various time intervals to follow the exchange progress by liquid UV-vis spectroscopy based on the typical sorption of  $\text{Cr}_2\text{O}_7^{2-}$  anion at 352 nm. The water solution (0.1 mL) of  $\text{K}_2\text{Cr}_2\text{O}_7$  was pipetted at different time intervals which was diluted by deionized water (2 mL) to measure the UV-vis intensity. The anion-exchange capacity of **3** was evaluated by measuring the decolorization rate for the solution of  $\text{K}_2\text{Cr}_2\text{O}_7$  according to the Beer's Law. The crystals turn yellow and obscure, which were kept in  $\text{CH}_3\text{CN}-\text{H}_2\text{O}$  (1 : 1). The yellow crystals suitable for single-crystal X-ray diffraction were determined to be  $[\text{Ag}(\text{L}^{243})](\text{Cr}_2\text{O}_7)_{0.5}(\text{CH}_3\text{CN})$  (**4**).

**Table S1** Crystallography data and structural refinement summary for **1–4**.

| Compound reference                                                            | <b>1</b>                                                                        | <b>2</b>                                                             | <b>3</b>                                                                       | <b>4</b>                                                            |
|-------------------------------------------------------------------------------|---------------------------------------------------------------------------------|----------------------------------------------------------------------|--------------------------------------------------------------------------------|---------------------------------------------------------------------|
| Chemical formula                                                              | C <sub>18</sub> H <sub>13</sub> AgCl <sub>3</sub> N <sub>7</sub> O <sub>2</sub> | C <sub>17</sub> H <sub>16.5</sub> AgN <sub>7</sub> O <sub>4.25</sub> | C <sub>19</sub> H <sub>14</sub> AgF <sub>3</sub> N <sub>6</sub> O <sub>3</sub> | C <sub>19</sub> H <sub>15</sub> AgCrN <sub>7</sub> O <sub>3.5</sub> |
| Formula mass                                                                  | 573.57                                                                          | 494.74                                                               | 539.23                                                                         | 557.25                                                              |
| Crystal system                                                                | triclinic                                                                       | monoclinic                                                           | monoclinic                                                                     | monoclinic                                                          |
| <i>a</i> /Å                                                                   | 9.355(5)                                                                        | 10.0544(6)                                                           | 10.2840(4)                                                                     | 10.1531(2)                                                          |
| <i>b</i> /Å                                                                   | 9.509(5)                                                                        | 14.8631(9)                                                           | 14.6472(6)                                                                     | 13.2623(4)                                                          |
| <i>c</i> /Å                                                                   | 13.743(7)                                                                       | 13.3957(8)                                                           | 15.6111(5)                                                                     | 15.5979(3)                                                          |
| $\alpha$ /°                                                                   | 76.120(7)                                                                       | 90                                                                   | 90                                                                             | 90                                                                  |
| $\beta$ /°                                                                    | 84.113(8)                                                                       | 98.2720(10)                                                          | 118.983(2)                                                                     | 95.662(2)                                                           |
| $\gamma$ /°                                                                   | 66.219(7)                                                                       | 90                                                                   | 90                                                                             | 90                                                                  |
| Unit cell volume/Å <sup>3</sup>                                               | 1086.1(9)                                                                       | 1981.0(2)                                                            | 2057.03(14)                                                                    | 2090.07(9)                                                          |
| Temperature/K                                                                 | 296(2)                                                                          | 173(2)                                                               | 296(2)                                                                         | 296(2)                                                              |
| Space group                                                                   | <i>P</i> -1                                                                     | <i>P</i> 2 <sub>1</sub> / <i>n</i>                                   | <i>P</i> 2 <sub>1</sub> / <i>c</i>                                             | <i>P</i> 2 <sub>1</sub> / <i>n</i>                                  |
| <i>Z</i>                                                                      | 2                                                                               | 4                                                                    | 4                                                                              | 4                                                                   |
| $\mu$ /mm <sup>-1</sup>                                                       | 1.328                                                                           | 1.058                                                                | 1.042                                                                          | 1.496                                                               |
| No. of reflections measured                                                   | 5689                                                                            | 14413                                                                | 10334                                                                          | 8644                                                                |
| No. of independent reflections                                                | 3934                                                                            | 4915                                                                 | 3634                                                                           | 3660                                                                |
| <i>R</i> <sub>int</sub>                                                       | 0.0125                                                                          | 0.0196                                                               | 0.0140                                                                         | 0.0206                                                              |
| Final <i>R</i> <sub>1</sub> values ( <i>I</i> > 2σ( <i>I</i> ))               | 0.0430                                                                          | 0.0334                                                               | 0.0442                                                                         | 0.0471                                                              |
| Final <i>wR</i> ( <i>F</i> <sup>2</sup> ) values ( <i>I</i> > 2σ( <i>I</i> )) | 0.1088                                                                          | 0.0951                                                               | 0.1264                                                                         | 0.0985                                                              |
| Final <i>R</i> <sub>1</sub> values (all data)                                 | 0.0479                                                                          | 0.0377                                                               | 0.0487                                                                         | 0.0394                                                              |
| Final <i>wR</i> ( <i>F</i> <sup>2</sup> ) values (all data)                   | 0.1127                                                                          | 0.0985                                                               | 0.1315                                                                         | 0.0929                                                              |
| Goodness of fit on <i>F</i> <sup>2</sup>                                      | 1.052                                                                           | 1.046                                                                | 1.051                                                                          | 1.046                                                               |

**Table S2** Selective bond lengths (Å) and angles (°) for **1–4**.

---

| <b>1</b>    |            |            |            |
|-------------|------------|------------|------------|
| Ag1–N3      | 2.327(3)   | Ag1–N5A    | 2.404(3)   |
| Ag1–O2      | 2.460(4)   | Ag1–N1B    | 2.495(4)   |
| Ag1–O1      | 2.558(4)   |            |            |
|             |            |            |            |
| N3–Ag1–N5A  | 116.51(12) | N3–Ag1–O2  | 105.53(15) |
| N5A–Ag1–O2  | 126.67(15) | N3–Ag1–N1B | 91.80(12)  |
| N1B–Ag1–N5A | 93.34(12)  | N1B–Ag1–O2 | 117.41(16) |
| N3–Ag1–O1   | 152.11(16) | N5A–Ag1–O1 | 90.25(15)  |
| O2–Ag1–O1   | 47.96(17)  | N1B–Ag1–O1 | 94.46(15)  |

Symmetry codes: A =  $-x + 1, -y + 2, -z + 1$ ; B =  $-x + 2, -y + 1, -z + 1$ .

| <b>2</b>    |           |             |           |
|-------------|-----------|-------------|-----------|
| Ag1–N5A     | 2.319(2)  | Ag1–N6B     | 2.354(2)  |
| Ag1–N1      | 2.381(2)  | Ag1–N4C     | 2.433(2)  |
|             |           |             |           |
| N5A–Ag1–N6B | 139.13(8) | N5A–Ag1–N1  | 104.62(8) |
| N1–Ag1–N6B  | 113.89(8) | N5A–Ag1–N4C | 98.30(8)  |
| N6B–Ag1–N4C | 89.66(8)  | N1–Ag1–N4C  | 98.02(8)  |

Symmetry codes: A =  $x + 1/2, -y + 3/2, z + 1/2$ ; B =  $-x + 1, -y + 1, -z + 1$ ; C =  $-x, -y + 1, -z + 1$ .

| <b>3</b> |          |         |          |
|----------|----------|---------|----------|
| Ag1–N5B  | 2.311(3) | Ag1–N6A | 2.332(3) |
| Ag1–N1   | 2.504(4) | Ag1–N3C | 2.388(3) |

|             |            |             |            |
|-------------|------------|-------------|------------|
| N5B–Ag1–N6A | 141.41(12) | N5B–Ag1–N3C | 105.63(12) |
| N3C–Ag1–N6A | 110.03(12) | N5B–Ag1–N1  | 95.93(14)  |
| N6A–Ag1–N1  | 94.50(13)  | N1–Ag1–N3C  | 96.14(12)  |

Symmetry codes: A =  $x - 1, y, z$ ; B =  $-x, y - 1/2, -z + 3/2$ ; C =  $-x, -y + 1, -z + 1$ .

#### 4

|             |            |             |           |
|-------------|------------|-------------|-----------|
| Ag1–N4A     | 2.278(3)   | Ag1–N6B     | 2.281(3)  |
| Ag1–N2C     | 2.488(3)   | Ag1–N5      | 2.519(3)  |
| N4A–Ag1–N6B | 158.74(12) | N4A–Ag1–N2C | 98.08(11) |
| N6B–Ag1–N2C | 103.17(11) | N4A–Ag1–N5  | 85.40(12) |
| N6B–Ag1–N5  | 91.86(12)  | N2C–Ag1–N5  | 97.39(12) |

Symmetry codes: A =  $x - 1/2, -y + 1/2, z + 1/2$ ; B =  $x - 1, y, z$ ; C =  $-x, -y + 1, -z + 1$ .

---

**Table S3** Hydrogen bonding geometries in the crystal structure of **4**.

| D–H...A       | D...A (Å) | H...A (Å) | D–H...A (°) | Symmetry code                |
|---------------|-----------|-----------|-------------|------------------------------|
| C5–H5A...O4   | 3.292(10) | 2.60      | 132         | $1/2 - x, 1/2 + y, 1/2 - z$  |
| O9–H9A...O2   | 3.403(6)  | 2.50      | 164         | $1 - x, 1 - y, 1 - z$        |
| O16–H16A...O4 | 3.272(9)  | 2.43      | 151         | $3/2 - x, -1/2 + y, 1/2 - z$ |

**Table S4** Comparison of structural features for **3** and **4**.

|                             | <b>3</b>                           | <b>4</b>                          |
|-----------------------------|------------------------------------|-----------------------------------|
| Dihedral angle <sup>a</sup> | 44.5°, 58.5°, 48.1°                | 39.0°, 51.3°, 60.8°               |
| Pore size <sup>b</sup>      | $10.135 \times 10.812 \text{ Å}^2$ | $9.769 \times 10.389 \text{ Å}^2$ |

<sup>a</sup> Dihedral angle between the central triazole ring and 2-, 3-, or 4-pyridyl ring.

<sup>b</sup> Calculated from the diagonal distances of the 1D channels.



**Table S5** Adsorption capacities of dichromate anion for the reported materials.

| MOF-Type Adsorbents         | Maximum Capacity (mg g <sup>-1</sup> ) | Ref.      | Other Type Adsorbents                                                           | Maximum Capacity (mg g <sup>-1</sup> ) | Ref.      |
|-----------------------------|----------------------------------------|-----------|---------------------------------------------------------------------------------|----------------------------------------|-----------|
| <b>3</b>                    | 207                                    | this work | uncalcined LDHs                                                                 | 6                                      | <b>9</b>  |
| <b>ZJU-101</b>              | 245                                    | <b>5</b>  | Calcined LDHs                                                                   | 17                                     | <b>9</b>  |
| <b>ABT·2ClO<sub>4</sub></b> | 214                                    | <b>6</b>  | Amino strach                                                                    | 12.12                                  | <b>13</b> |
| <b>MOF-867</b>              | 53.4                                   | <b>7</b>  | $\beta$ -CD and quaternary ammonium groups modified cellulose                   | 61.05                                  | <b>14</b> |
| <b>FIR-53</b>               | 74.2                                   | <b>7</b>  | Hexadecylpyridinium bromide modified natural zeolites                           | 14.31                                  | <b>15</b> |
| <b>FIR-54</b>               | 103.1                                  | <b>8</b>  | Modified magnetic chitosan chelating                                            | 58.48                                  | <b>16</b> |
| <b>SLUG-21</b>              | 60                                     | <b>9</b>  | NH <sub>2</sub> -TNTs                                                           | 153.85                                 | <b>17</b> |
| <b>1-ClO<sub>4</sub></b>    | 62.9                                   | <b>10</b> | Chitosan-coated fly ash                                                         | 33.27                                  | <b>18</b> |
| <b>SLUG-35</b>              | 68.5                                   | <b>11</b> | Eichhornia crassipes root biomass-derived activated carbon                      | 36.34                                  | <b>19</b> |
| <b>1-SO<sub>4</sub></b>     | 166                                    | <b>12</b> | Wheat-residue derived black carbon                                              | 21.34                                  | <b>20</b> |
|                             |                                        |           | Saw dust                                                                        | 41.5                                   | <b>21</b> |
|                             |                                        |           | Ethylenediamine-functionalized Fe <sub>3</sub> O <sub>4</sub> magnetic polymers | 61.35                                  | <b>22</b> |
|                             |                                        |           | Porous Organic Polymers                                                         | 172                                    | <b>23</b> |

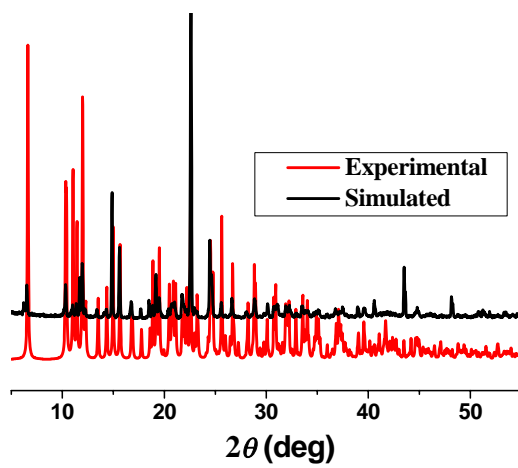

(a)

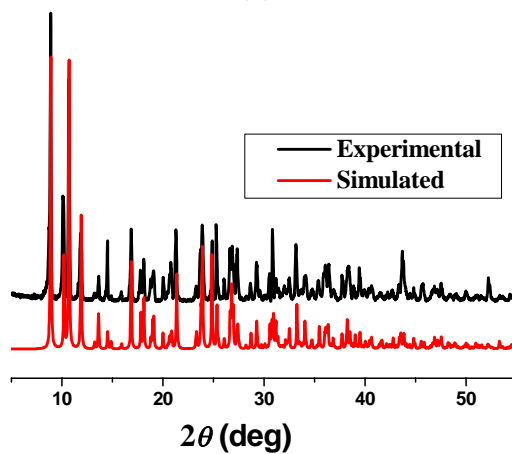

(b)

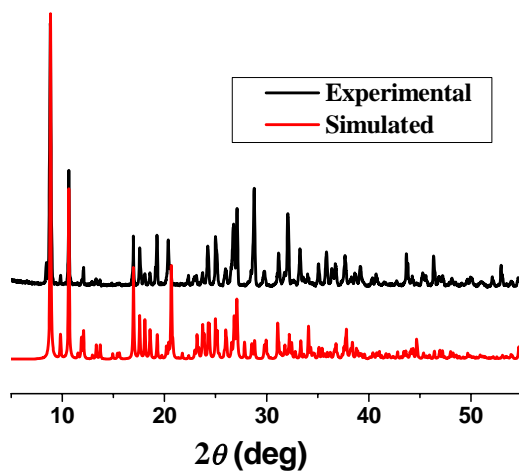

(c)

**Fig. S1** Powder X-ray diffraction (PXRD) patterns for **1–3**.

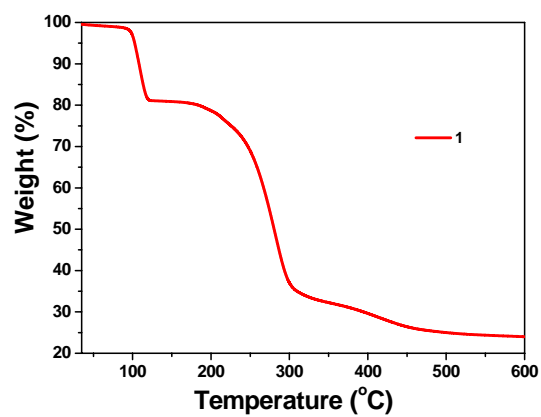

(a)

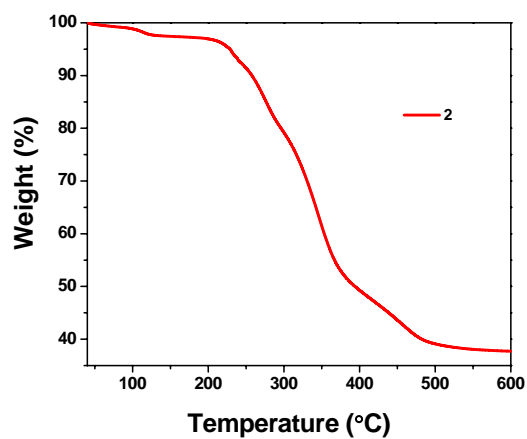

(b)

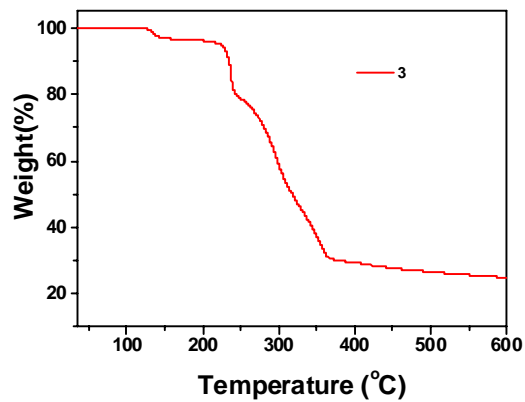

(c)

**Fig. S2** Thermogravimetric (TG) analysis curves for **1–3**.

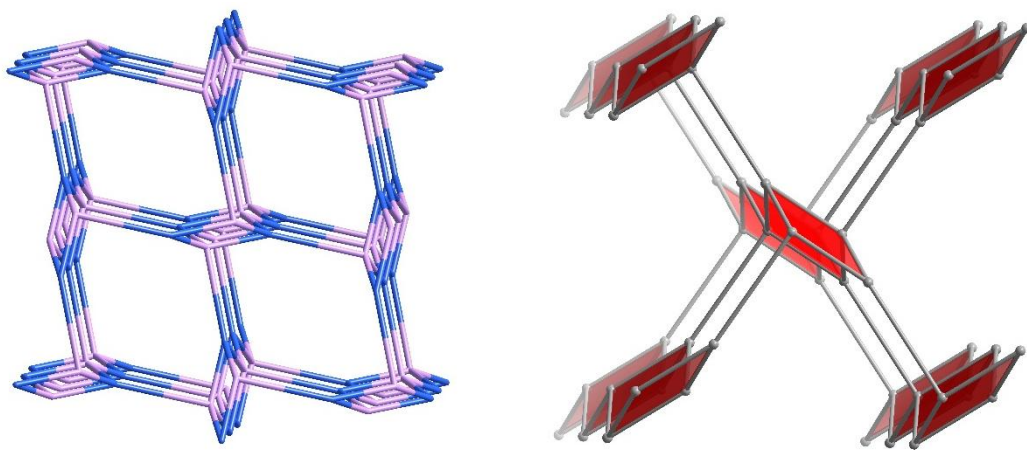

**Fig. S3** Topological view of the coordination network for **3**.

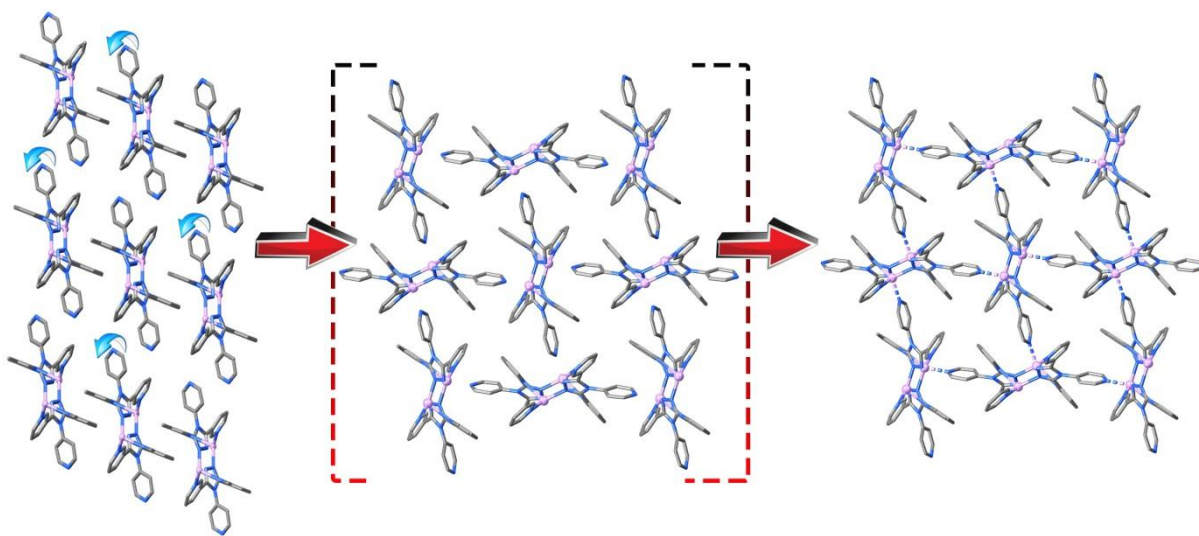

**Fig. S4** Rotation of the 1D chain SBUs during the structural transformation from **1** to **3**.

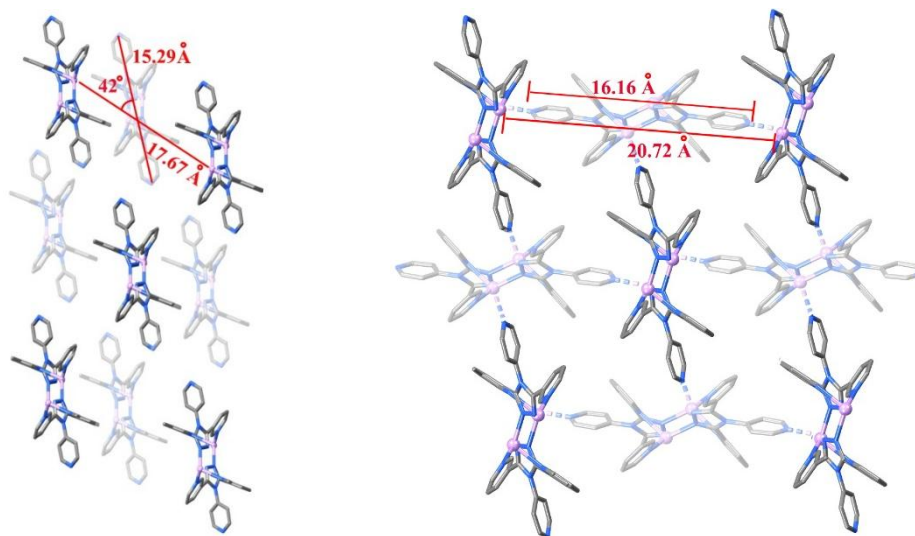

**Fig. S5** Comparison of the structural parameters between the 1D SBUs in **1** and **3**.

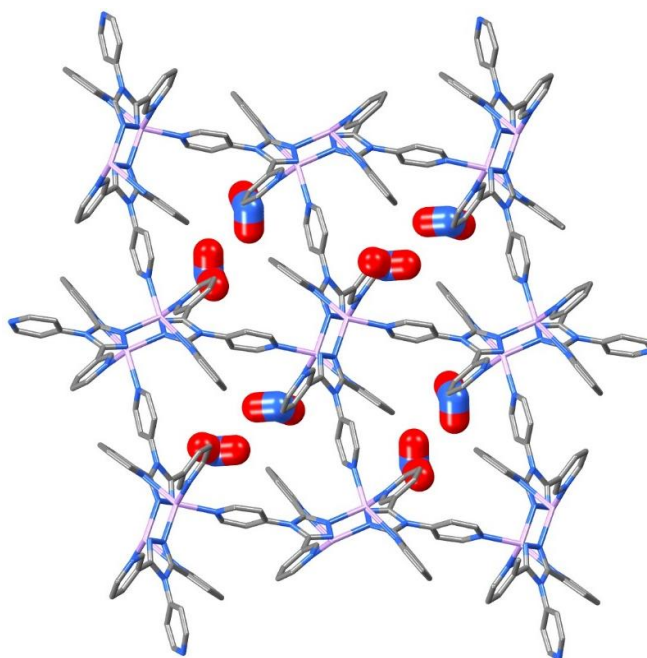

**Fig. S6** 3D cationic framework with the inclusion of lattice NO<sub>2</sub><sup>-</sup> anions in **2**.

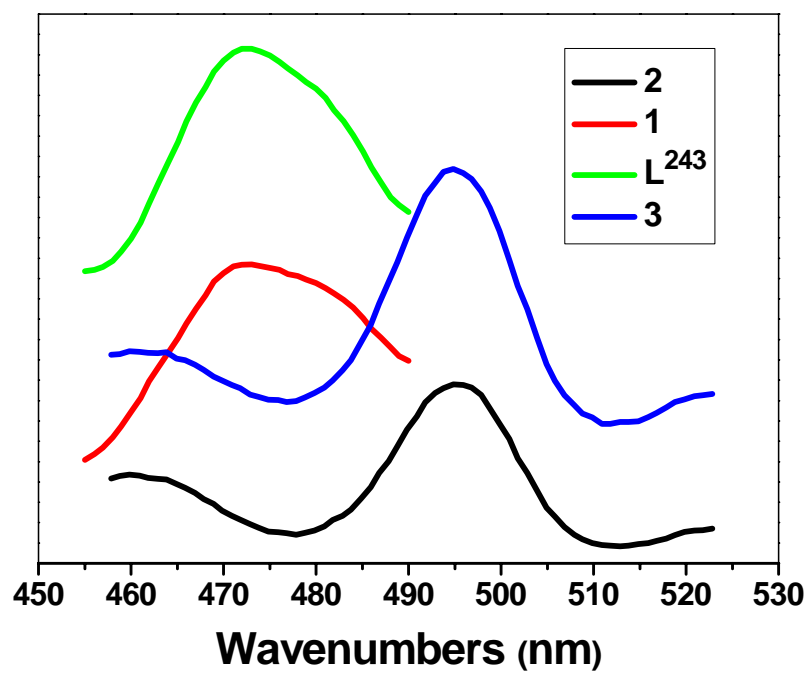

**Fig. S7** Solid state fluorescent emission spectra for **1–3** and L<sup>243</sup> ligand at room temperature.

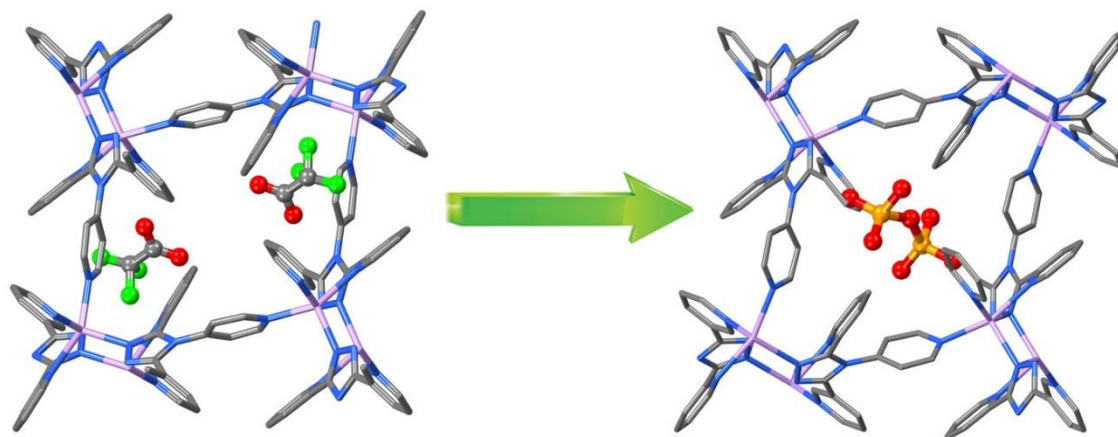

**Fig. S8** A portion view of the voids for anion inclusion in **3** and **4**.

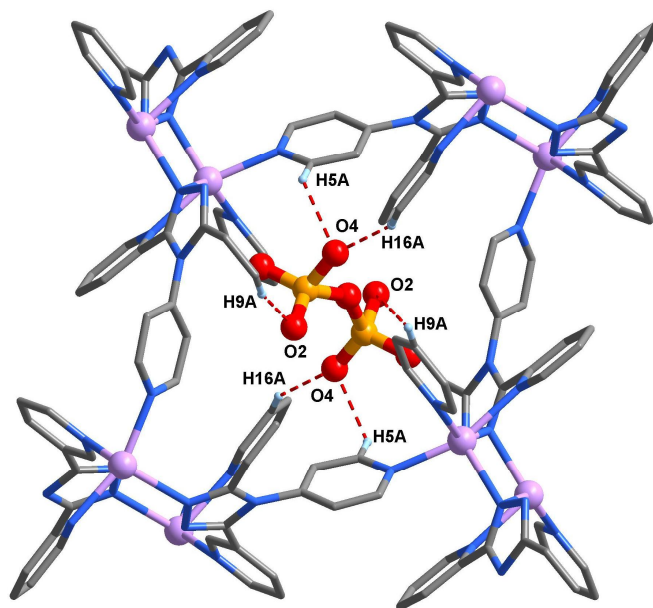

**Fig. S9** H-bonding interactions between  $\text{Cr}_2\text{O}_7^{2-}$  and the cationic framework in **4**.

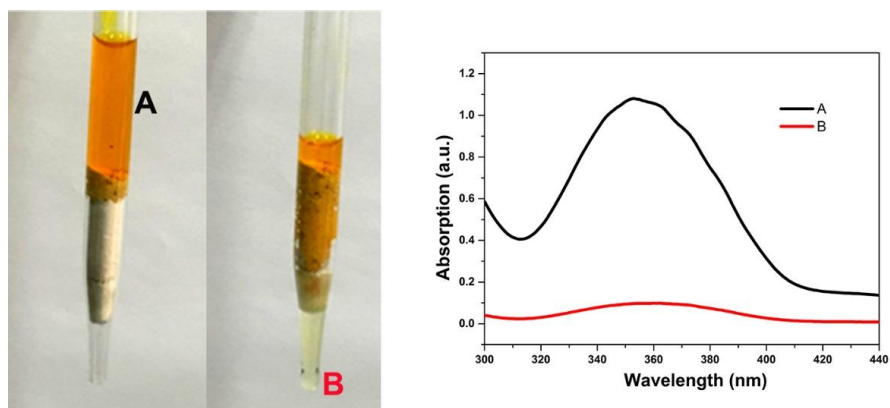

**Fig. S10** Column-chromatographic sorption for  $\text{K}_2\text{Cr}_2\text{O}_7$  and the corresponding UV-vis spectra.

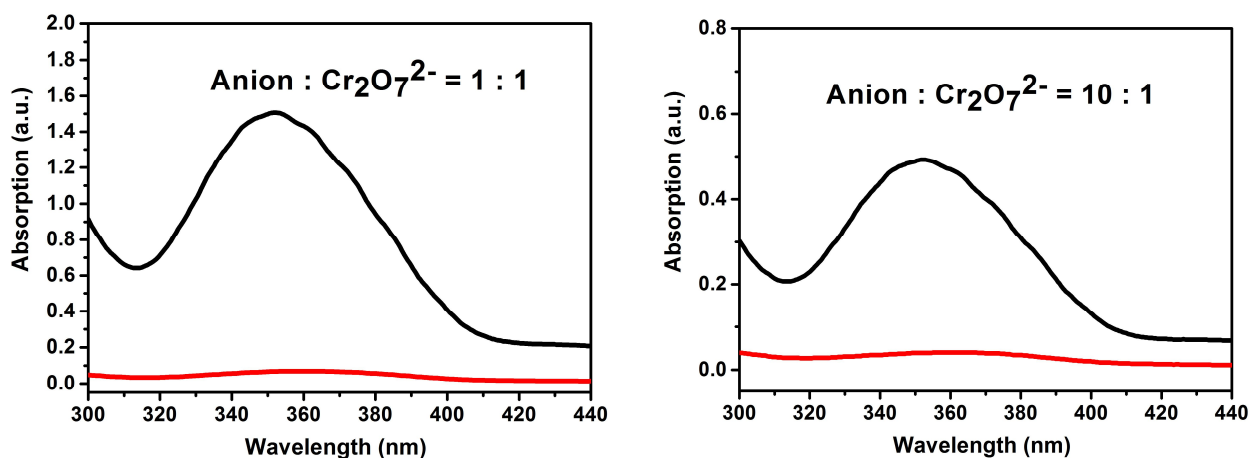

**Fig. S11** UV-vis absorbance spectra of  $\text{Cr}_2\text{O}_7^{2-}$  in mixture solutions with disturbing anions ( $\text{F}^-$ ,  $\text{Cl}^-$ ,  $\text{Br}^-$ ,  $\text{OAc}^-$ ,  $\text{SO}_4^{2-}$ ,  $\text{NO}_3^-$ ,  $\text{BF}_4^-$ ,  $\text{CH}_3\text{SO}_3^-$ ,  $\text{CF}_3\text{SO}_3^-$ , and  $\text{ClO}_4^-$ ) in different molar ratios.

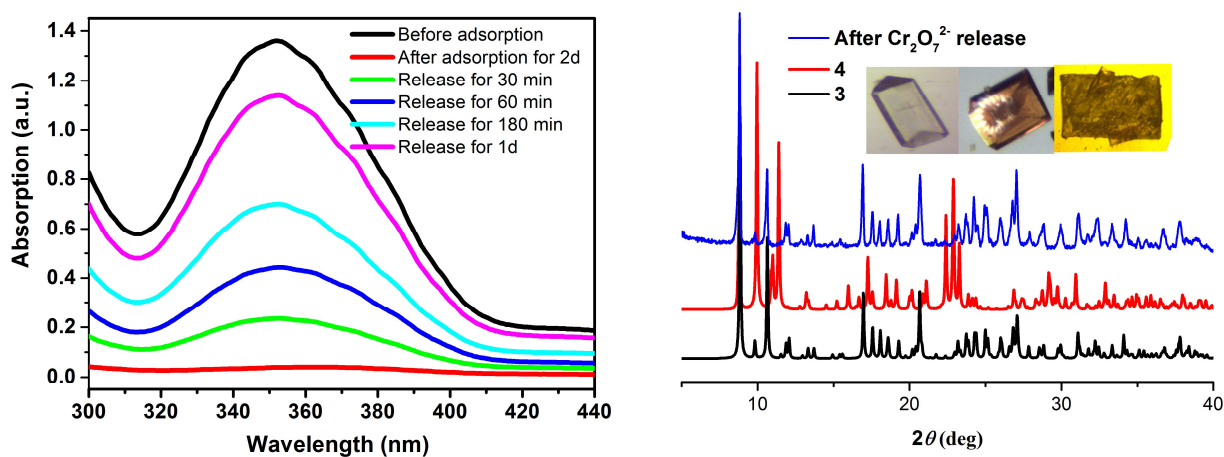

**Fig. S12** UV-vis spectra and powder X-ray diffraction (PXRD) patterns for  $\text{Cr}_2\text{O}_7^{2-}$  release experiment. The inset photographs show the change of one single crystal in adsorption-desorption cycle.



## References

- (1) M. H. Klingele and S. Brooker, *Eur. J. Org. Chem.*, 2004, 3422.
- (2) A. L. Spek, *J. Appl. Crystallogr.*, 2003, **36**, 7.
- (3) AXS Bruker, SAINT Software Reference Manual, Madison, WI, 1998.
- (4) G. M. Sheldrick, SHELXTL NT Version 5.1. Program for Solution and Refinement of Crystal Structures, University of Göttingen, Germany, 1997.
- (5) Q. Zhang, J. Yu, J. Cai, L. Zhang, Y. Cui, Y. Yang, B. Chen and G. Qian, *Chem. Commun.*, 2015, **51**, 14732.
- (6) X. Li, H. Xu, F. Kong and R. Wang. *Angew. Chem. Int. Ed.*, 2013, **52**, 13769.
- (7) K. M. Choi, H. M. Jeong, J. H. Park, Y. B. Zhang, J. K. Kang and O. M. Yaghi, *ACS Nano*, 2014, **8**, 7451.
- (8) H.-R. Fu, Z.-X. Xu and J. Zhang, *Chem. Mater.*, 2015, **27**, 205.
- (9) H. Fei, M. R. Bresler and S. R. J. Oliver, *J. Am. Chem. Soc.*, 2011, **133**, 11110.
- (10) P.-F. Shi, B. Zhao, G. Xiong, Y.-L. Hou and P. Cheng, *Chem. Commun.*, 2012, **48**, 8231.
- (11) H. Fei, C. S. Han, J. C. Robins and S. R. J. Oliver, *Chem. Mater.*, 2013, **25**, 647.
- (12) A. V. Desai, B. Manna, A. Karmakar, A. Sahu and S. K. Ghosh, *Angew. Chem. Int. Ed.*, 2016, **55**, 7811.
- (13) A. Dong, J. Xie, W. Wang, L. Yu, Q. Liu and Y. Yin, *J. Hazard. Mater.*, 2010, **181**, 448.
- (14) Y. Zhou, Q. Jin, T. Zhu and Y. Akama, *J. Hazard. Mater.*, 2011, **187**, 303.
- (15) Y. Zeng, H. Woo, G. Lee and J. Park, *Micropor. Mesopor. Mater.*, 2010, **130**, 83.
- (16) Y. G. A. El-Reash, M. Otto, I. M. Kenawy and A. M. Ouf, *Int. J. Biol. Macromol.*, 2011, **49**, 513.
- (17) L. Wang, W. Liu, T. Wang and J. Ni, *Chem. Eng. J.*, 2013, **225**, 153.
- (18) Y. Wen, Z. Tang, Y. Chen and Y. Gu, *Chem. Eng. J.*, 2011, **175**, 110.
- (19) A. K. Giri, R. Patel and S. Mandal, *Chem. Eng. J.*, 2012, **185**, 71.
- (20) X. S. Wang, L. F. Chen, F. Y. Li, K. L. Chen, W. Y. Wan and Y. J. Tang, *J. Hazard. Mater.*, 2010, **175**, 816.
- (21) S. Gupta and B. V. Babu, *Chem. Eng. J.*, 2009, **150**, 352.
- (22) Y. G. Zhao, H. Y. Shen, S. D. Pan and M. Q. Hu, *J. Hazard. Mater.*, 2010, **182**, 295.
- (23) Y. Su, Y. Wang, X. Li, X. Li and R. Wang, *ACS Appl. Mater. Interfaces*, 2016, **8**, 18904.
